# Supplementary material for: Electrochemical performance degeneration mechanism of LiCoO2 with high state of charge during long-term charge/discharge cycling
Source: Royal Society of Chemistry journal article supplement (doi:10.1039/c5ra13841h), 2015-01-01
Supplement: c5ra13841h1.pdf [file c5ra13841h1.pdf]

## **Supporting information**

### **Electrochemical Performance Degeneration Mechanism of LiCoO<sub>2</sub> with High State of Charge during Long-Term Charge/Discharge Cycling**

Shuaifeng Lou<sup>†</sup>, Bin Shen<sup>†</sup>, Pengjian Zuo<sup>\*</sup>, Geping Yin<sup>\*</sup>, Lijie Yang, Yulin Ma,  
Xinqun Cheng, Chunyu Du, Yunzhi Gao

Institute of Advanced Chemical Power Sources, School of Chemical Engineering and  
Technology, Harbin Institute of Technology, 92 West Dazhi Street, Harbin 150001,  
China

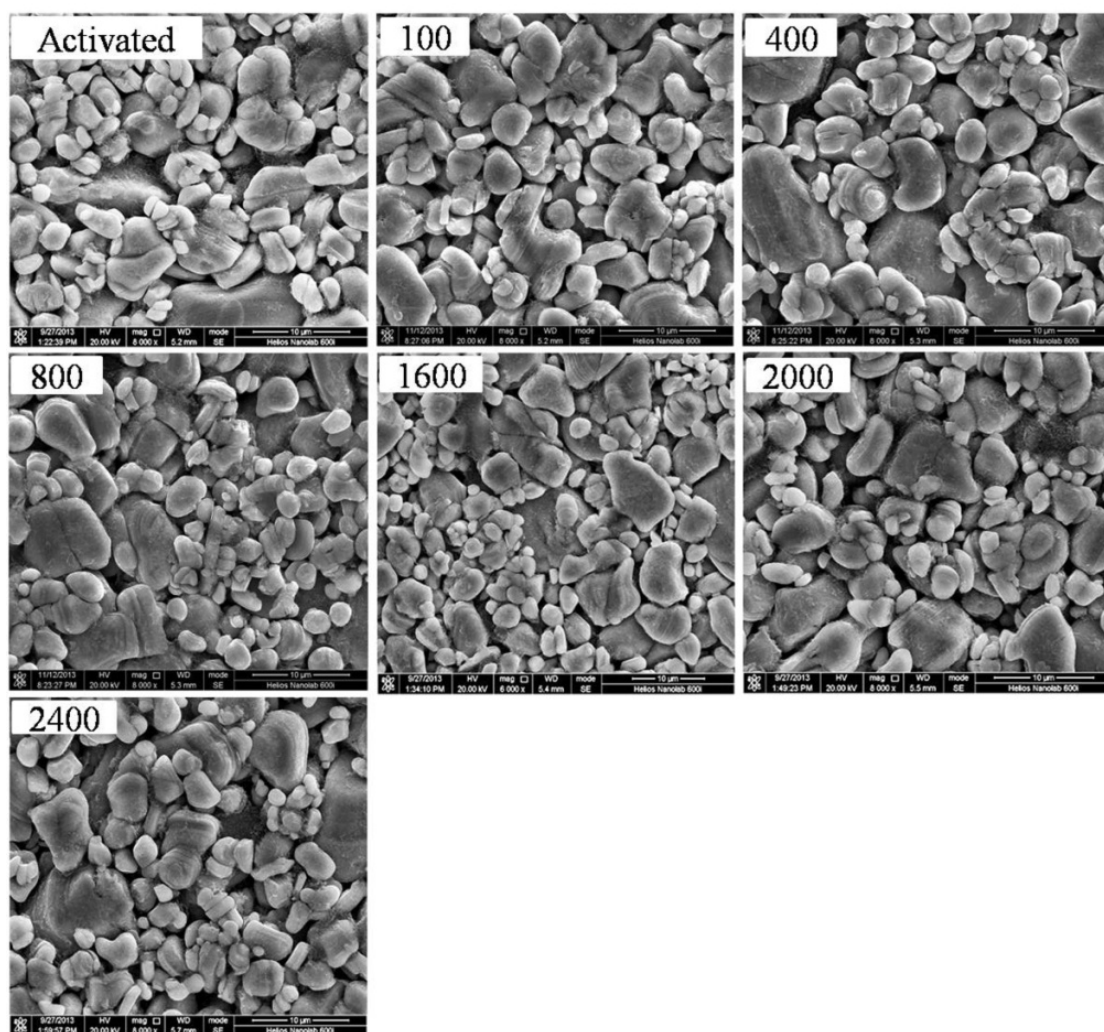

Fig. S1 SEM images of  $\text{LiCoO}_2$  electrodes after different cycles (activated, 100 400, 800, 1600, 2000, 2400)
